# Supplementary material for: The critical role of anions in the porous biochar structure and potassium release during the potassium-assisted pyrolysis process
Source: Royal Society of Chemistry journal article supplement (doi:10.1039/d1gc03072h), 2021-01-01
Supplement: d1gc03072h1.pdf [file d1gc03072h1.pdf]

## **Electronic Supporting Information**

### **Critical role of anions on porous biochar structure and potassium release during potassium–assisted pyrolysis process**

**Mingwei Xia,<sup>a</sup> Wei Chen,<sup>a</sup> Jing Wu,<sup>a</sup> Yingquan Chen,<sup>\*a</sup> Haiping Yang,<sup>\*a</sup>**

**Xu Chen,<sup>a</sup> Danchen Zhu<sup>a</sup> and Hanping Chen<sup>a</sup>**

<sup>a</sup> State Key Laboratory of Coal Combustion, Huazhong University of Science and Technology,

1037 Luoyu Road, 430074, Wuhan, P. R. China

Authors' Email: sam\_xia@hust.edu.cn (Mingwei Xia); chenwei\_hk@163.com (Wei Chen);

wujing84@hust.edu.cn (Jing Wu); yhping\_2002@163.com (Haiping Yang); chxu@hust.edu.cn

(Xu Chen); chen\_19930501@163.com (Danchen Zhu); fbghust@163.com (Hanping Chen)

**\*Corresponding author**

**Email: chenyingquan@hust.edu.cn, Tel: +86 27 87542417 (Yingquan Chen)**

**yhping\_2002@163.com, Tel: +86 27 87542417 (Haiping Yang)**

**Number of Figures: 5; Number of Tables: 4**

## **Figure list**

**Figure S1.** Diagram of vertical fixed bed reactor for BPC preparation process

**Figure S2.** Diagrams and digital pictures of as-obtained solid products

**Figure S3.** Raman spectra of as-prepared biochar and their deconvolution

**Figure S4.** Textural properties of porous biochars from KAc-assisted pyrolysis

**Figure S5.** Potassium release rate during KAc-assisted pyrolysis

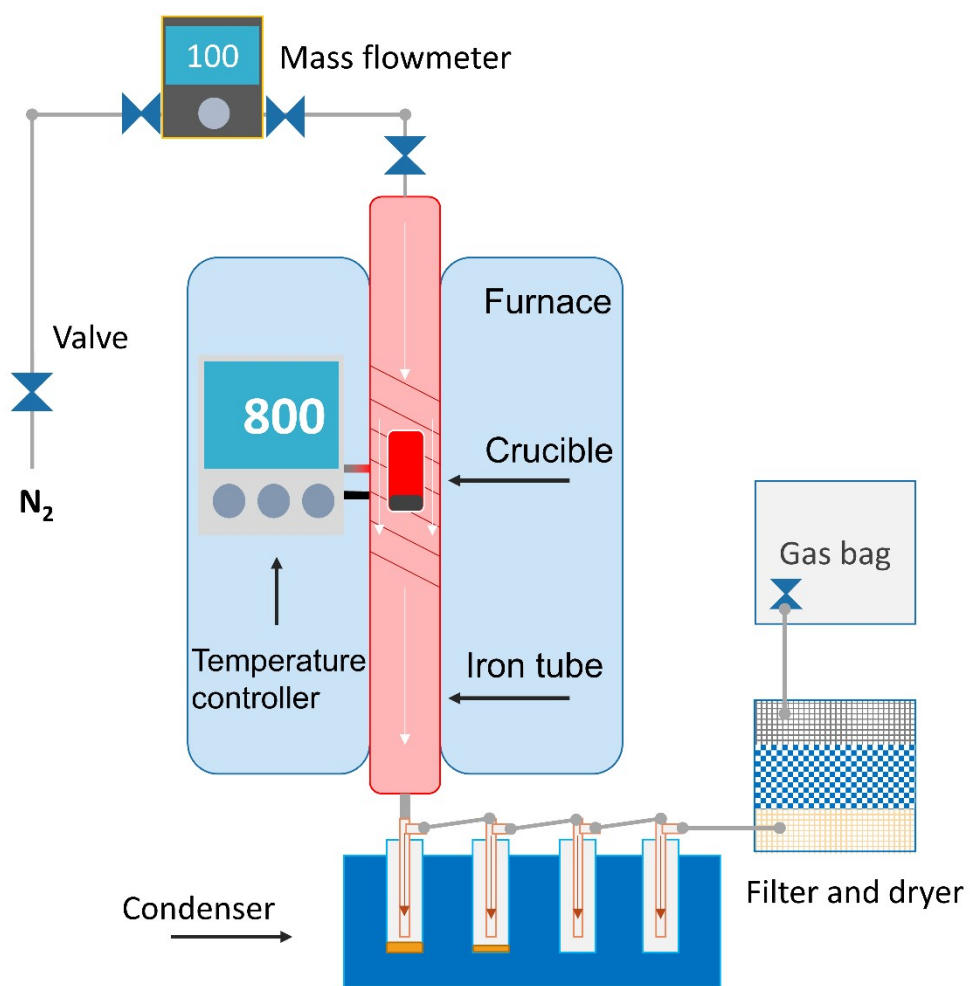

**Figure S1.** Diagram of vertical fixed bed reactor for potassium-assisted pyrolysis process

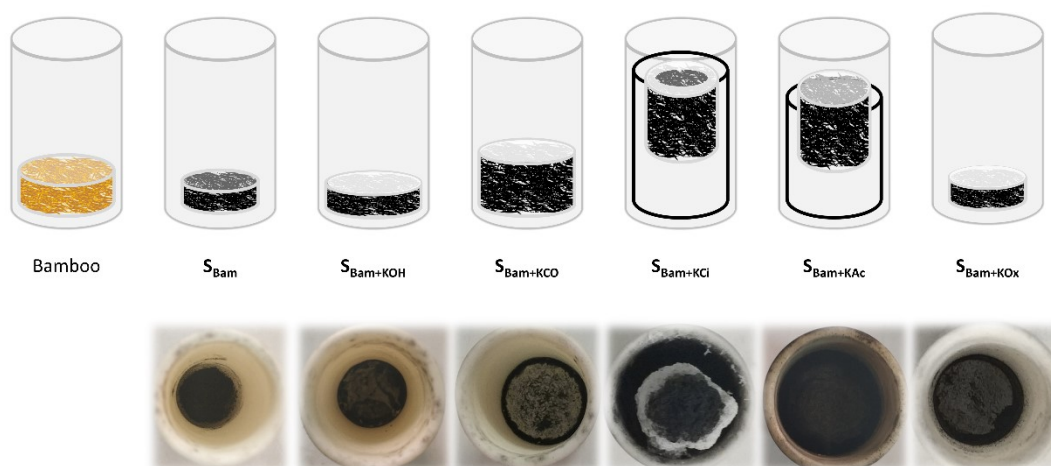

**Figure S2.** Diagrams and digital pictures of as-prepared solid products (S: solid product, S<sub>Bam+KOH</sub>: solid product from bamboo and KOH)

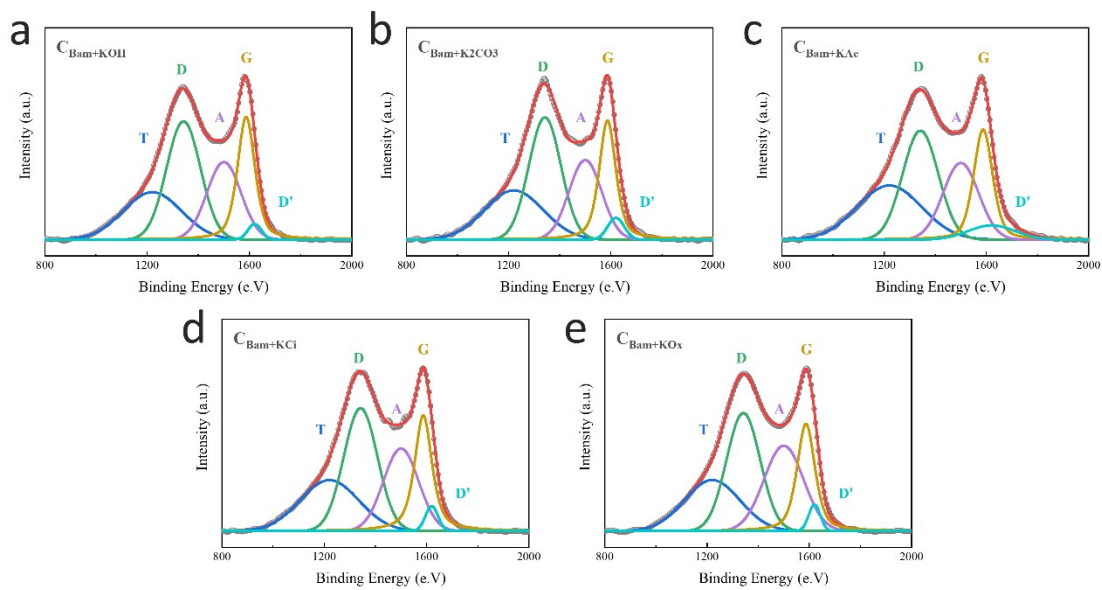

**Figure S3.** Raman spectra of as-prepared biochar and their deconvolution.

(a)  $C_{\text{Bam}+\text{KOH}}$ , (b)  $C_{\text{Bam}+\text{K}_2\text{CO}_3}$ , (c)  $C_{\text{Bam}+\text{KAc}}$ , (d)  $C_{\text{Bam}+\text{KCl}}$ , (e)  $C_{\text{Bam}+\text{KOx}}$

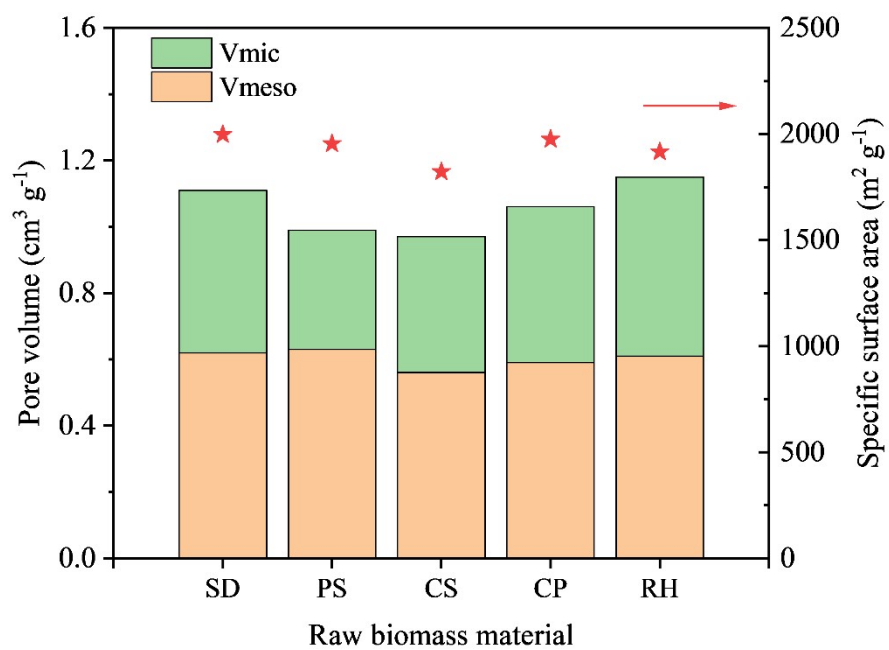

**Figure S4.** Textural properties of porous biochars from KAc-assisted pyrolysis

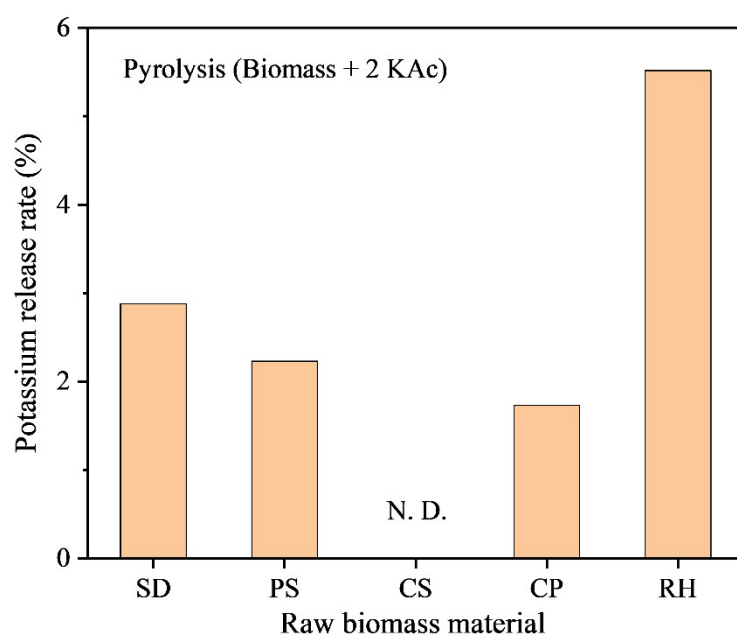

**Figure S5.** Potassium release rate during KAc-assisted pyrolysis (N. D.: Not Detected)

**Table list**

**Table S1.** Biomass compositions analysis

**Table S2.** Selected potassium additives and their added amounts

**Table S3.** Yields and textural properties of porous biochars from cornpith with larger dosage of additives

**Table S4.** Yields and textural properties of porous biochars from different biomass raw materials via KAc-assisted pyrolysis



**Table S1.** Biomass compositions analysis

| Precursors                                  | Ash (wt.%),<br>dry basis | Biochemical composition (wt.%), dry basis |               |                                |                  |                               |                 |                   |                                |
|---------------------------------------------|--------------------------|-------------------------------------------|---------------|--------------------------------|------------------|-------------------------------|-----------------|-------------------|--------------------------------|
|                                             |                          | Cellulose                                 | Hemicellulose | Lignin <sup>a</sup>            | Extractives      |                               |                 |                   |                                |
| Bamboo (Bam)                                | 5.47                     | 40.36                                     | 23.05         | 28.47                          | 2.65             |                               |                 |                   |                                |
| Sawdust (SD)                                | 1.19                     | 43.19                                     | 18.83         | 12.89                          | 23.90            |                               |                 |                   |                                |
| Peanut shell (PS)                           | 3.83                     | 31.81                                     | 14.41         | 45.15                          | 4.80             |                               |                 |                   |                                |
| Cotton straw (CS)                           | 3.14                     | 36.56                                     | 15.67         | 31.25                          | 13.38            |                               |                 |                   |                                |
| Corn pith (CP)                              | 10.36                    | 42.73                                     | 22.09         | 0.23                           | 24.59            |                               |                 |                   |                                |
| Rice husk (RH)                              | 17.05                    | 38.14                                     | 18.73         | 20.32                          | 5.76             |                               |                 |                   |                                |
| Inorganic composition (%) as oxide from XRF |                          |                                           |               |                                |                  |                               |                 |                   |                                |
|                                             | K <sub>2</sub> O         | CaO                                       | MgO           | Al <sub>2</sub> O <sub>3</sub> | SiO <sub>2</sub> | P <sub>2</sub> O <sub>5</sub> | SO <sub>3</sub> | Cl <sub>2</sub> O | Fe <sub>2</sub> O <sub>3</sub> |
| Bamboo (Bam)                                | 36.23                    | 7.14                                      | 14.02         | 2.62                           | 9.23             | 11.71                         | 15.44           | n. d.             | 0.59                           |
| Sawdust (SD)                                | 1.71                     | 53.09                                     | 35.69         | n. d.                          | 1.96             | 2.52                          | 4.21            |                   | 0.24                           |
| Peanut shell (PS)                           | 14.00                    | 27.92                                     | 22.52         | 4.42                           | 10.38            | 9.26                          | 7.29            | 1.87              | 0.82                           |
| Cotton straw (CS)                           | 30.51                    | 27.94                                     | 9.06          | 2.24                           | 3.87             | 11.59                         | 11.74           | 2.37              | 0.58                           |
| Corn pith (CP)                              | 27.27                    | 27.41                                     | 3.63          | 3.40                           | 21.49            | 8.06                          | 1.95            | 5.36              | 1.15                           |
| Rice husk (RH)                              | 1.80                     | 0.88                                      | n. d.         | n. d.                          | 96.36            | n. d.                         | 0.55            | n. d.             | 0.24                           |

a- by difference, Lignin (wt.%) = 100– Ash- Cellulose- Hemicellulose- Extractives (wt.%).

n. d.: not detected.

**Table S2.** Selected potassium additives and their added amounts

| Potassium additive            | Abbreviation                   | Content of potassium<br>mol/g | Added amount <sup>a</sup><br>g |
|-------------------------------|--------------------------------|-------------------------------|--------------------------------|
| Potassium Hydroxide (85%)     | KOH                            | 0.01515                       | 0.34                           |
| Potassium Carbonate           | K <sub>2</sub> CO <sub>3</sub> | 0.01447                       | 0.35                           |
| Potassium Acetate (92%)       | KAc                            | 0.00937                       | 0.54                           |
| Potassium Citrate Monohydrate | KCi                            | 0.00925                       | 0.55                           |
| Potassium Oxalate Monohydrate | KOx                            | 0.01086                       | 0.47                           |

a- the added amount was determined by 5 mmol potassium content in a chemical.

**Table S3.** Yields and textural properties of porous biochars from cornpith with larger dosage of additives

| Sample <sup>a</sup>                         | Yield<br>wt. % | SSA<br>m <sup>2</sup> g <sup>-1</sup> | V <sub>t</sub><br>cm <sup>3</sup> g <sup>-1</sup> | V <sub>mic</sub> <sup>b</sup><br>cm <sup>3</sup> g <sup>-1</sup> | V <sub>mic</sub> / V <sub>t</sub><br>% | V <sub>mes</sub><br>cm <sup>3</sup> g <sup>-1</sup> |
|---------------------------------------------|----------------|---------------------------------------|---------------------------------------------------|------------------------------------------------------------------|----------------------------------------|-----------------------------------------------------|
| C <sub>CP+KOH</sub>                         | 1.8            | 1762                                  | 0.90                                              | 0.62                                                             | 69                                     | 0.28                                                |
| C <sub>CP+K<sub>2</sub>CO<sub>3</sub></sub> | 12.4           | 1720                                  | 0.76                                              | 0.64                                                             | 84                                     | 0.12                                                |
| C <sub>CP+KAc</sub>                         | 20.0           | 1521                                  | 0.71                                              | 0.56                                                             | 79                                     | 0.15                                                |
| C <sub>CP+KCl</sub>                         | 16.4           | 1462                                  | 0.64                                              | 0.48                                                             | 75                                     | 0.16                                                |
| C <sub>CP+KOx</sub>                         | 14.2           | 1440                                  | 0.76                                              | 0.64                                                             | 84                                     | 0.12                                                |

a- Biochar samples were prepared from cornpith pyrolysis with 10 mmol potassium additive.

b- V<sub>mic</sub>, V<sub>mic</sub>/V<sub>t</sub> and V<sub>mes</sub> were calculated by t-plot method.

**Table S4.** Yields and textural properties of porous biochars from different biomass raw materials via KAc-assisted pyrolysis

| Sample                       | Yield<br>wt. % | SSA<br>m <sup>2</sup> g <sup>-1</sup> | V <sub>t</sub><br>cm <sup>3</sup> g <sup>-1</sup> | V <sub>mic</sub> <sup>b</sup><br>cm <sup>3</sup> g <sup>-1</sup> | V <sub>mic</sub> / V <sub>t</sub><br>% | V <sub>mes</sub><br>cm <sup>3</sup> g <sup>-1</sup> |
|------------------------------|----------------|---------------------------------------|---------------------------------------------------|------------------------------------------------------------------|----------------------------------------|-----------------------------------------------------|
| C <sub>SD</sub> <sup>a</sup> | 21.6           | 1997                                  | 1.11                                              | 0.62                                                             | 56                                     | 0.49                                                |
| C <sub>PS</sub>              | 28.1           | 1954                                  | 0.99                                              | 0.63                                                             | 64                                     | 0.36                                                |
| C <sub>CS</sub>              | 17.7           | 1822                                  | 0.97                                              | 0.56                                                             | 58                                     | 0.41                                                |
| C <sub>CP</sub>              | 15.7           | 1975                                  | 1.06                                              | 0.59                                                             | 56                                     | 0.47                                                |
| C <sub>RH</sub>              | 23.0           | 1916                                  | 1.15                                              | 0.61                                                             | 51                                     | 0.54                                                |

- a- for C<sub>X</sub>, X indicates the precursor, C<sub>X</sub>s were prepared from pyrolysis of various biomass raw materials with 10 mmol KAc under 800 °C at heating rate of 15 °C min<sup>-1</sup>;
- b- V<sub>mic</sub>, V<sub>mic</sub>/V<sub>t</sub> and V<sub>mes</sub> were calculated by t-plot method.
